# Supplementary material
Source: publisher figshare collection journal article supplement (https://karger.figshare.com/ndownloader/files/22028520)

# Test-retest reliability of frontal alpha-asymmetry during presentation of emotional face-stimuli in healthy subjects

Kristin Koller-Schlaud<sup>a,b</sup>, Julia Querbach<sup>a</sup>, Joachim Behr<sup>a,b,c</sup>, Andreas Ströhle<sup>a</sup>, Johannes Rentzsch<sup>a,b</sup>

<sup>a</sup> Department of Psychiatry and Psychotherapy, Charité - Universitätsmedizin Berlin, Campus Charité Mitte, Charitéplatz 1, 10117 Berlin, Germany

<sup>b</sup> Department of Psychiatry, Psychotherapy and Psychosomatics, Brandenburg Medical School Theodor Fontane, Fehrbelliner Straße 38, 16816 Neuruppin, Germany

<sup>c</sup> Faculty of Health Science Brandenburg, Joint Faculty of the University of Potsdam, Brandenburg University of Technology Cottbus-Senftenberg and Brandenburg Medical School Theodor Fontane, Karl-Liebknecht-Str. 24-25, 14476 Potsdam, Germany

## Supplemental Figures 1

Figure 1 shows the experimental task. For description see manuscript.

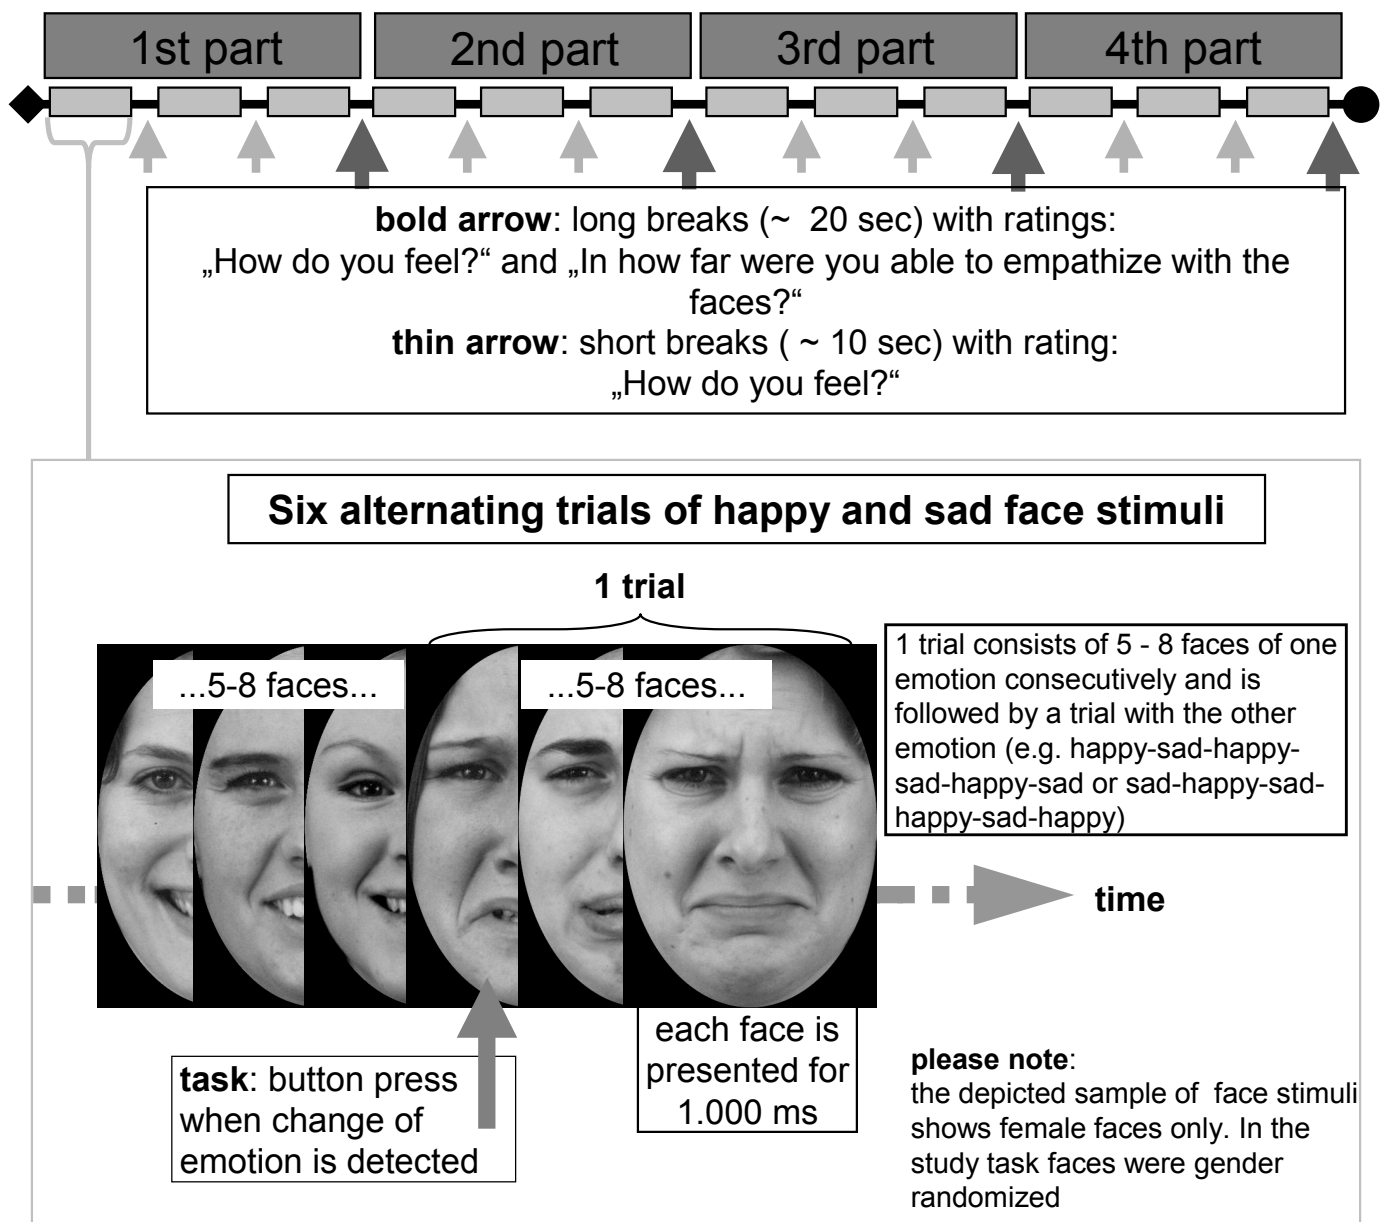

## Supplemental Figures 2 A - D

Figures show power values ( $\mu V$ ) from 5-30 Hz of the FFT analysis for left and right electrodes and the topographic distribution of the alpha power band (8-13 Hz).

Please note the different scales of the topographic maps: 0.3-0.5  $\mu V^2$  for 1st session and 1st block and 0.3-.07 $\mu V^2$  for 2nd session and 2nd block .

A: Happy face condition: shown are the results of the first and second block across session 1 and 2.

B: Happy face condition: shown are the results of the first and second session across both blocks.

C: Sad face condition: shown are the results of the first and second block across session 1 and 2.

D: Sad face condition: shown are the results of the first and second session across both blocks.

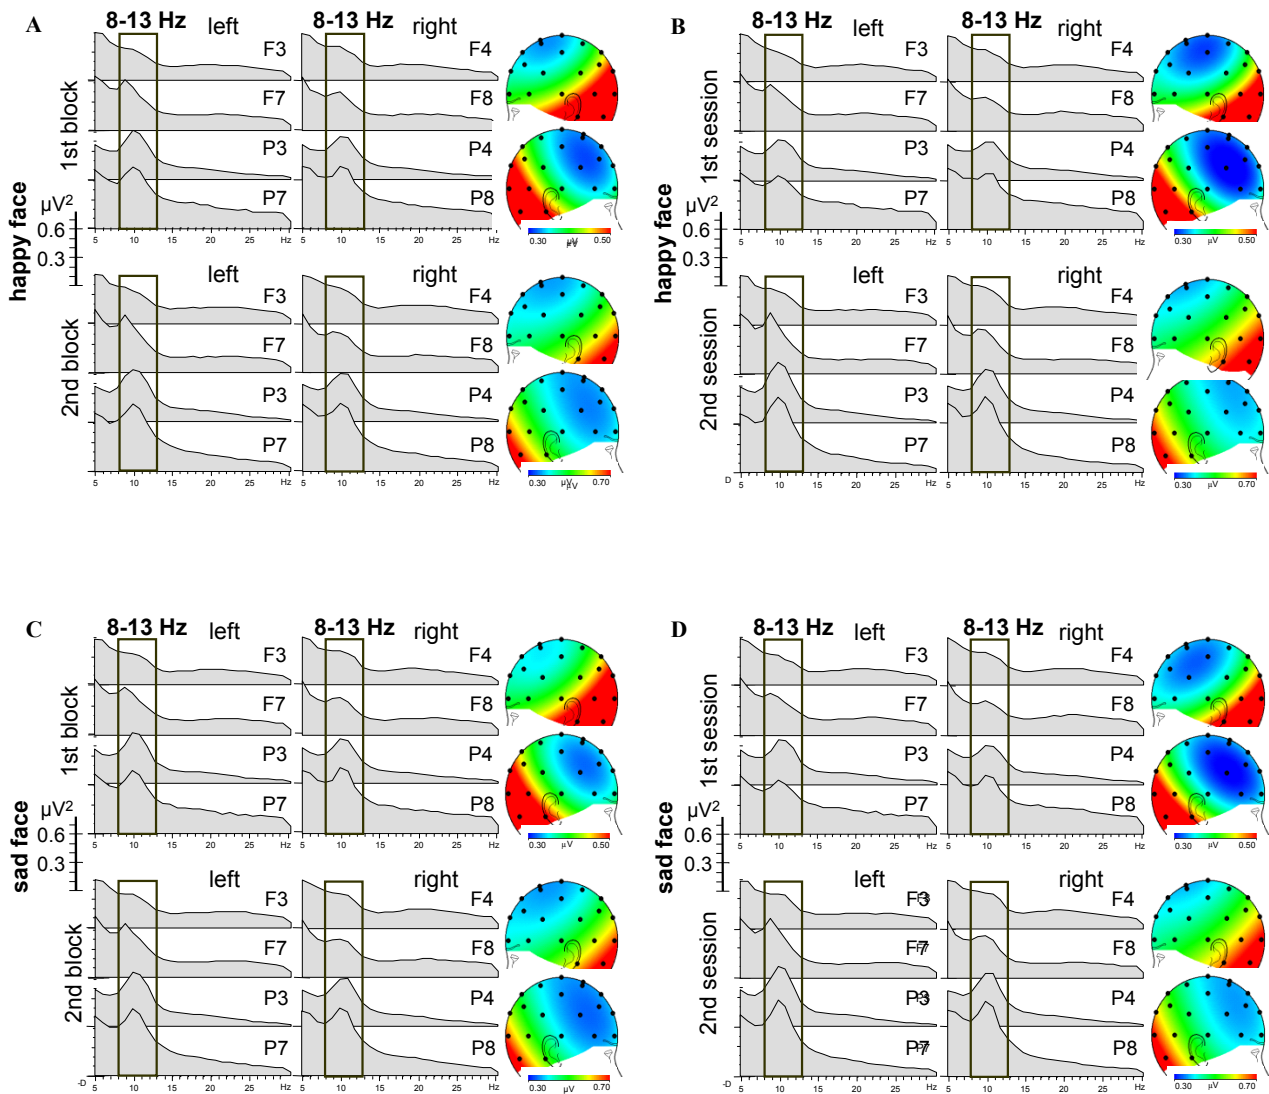

Supplement: Supplementary file 1 [file 22028520]
